# Supplementary material
Source: publisher figshare collection journal article supplement (https://gsajournals.figshare.com/articles/dataset/_/24018756)
Supplement: Supplementary file 1 [file 1]

## Sheet: Sheet1
Supplementary Table S4. List of Blast hits in Tripsacum and Teosinte genomes for ZmGa1P as query sequence. Sequences in shaded rows are full-length (without indels or stop codons)
Genotype	Locus	Scaffold/ Chromosome	E-value	Start	Stop	Length	% identities
Tripsacum dactyloides (FL_9056069_6)	NA	scaf_33	0	13709170	13707913	1261	93.894
		scaf_33	0	13575430	13574440	991	91.322
		scaf_33	0	13659157	13658729	432	95.139
		scaf_33	0	13748714	13748286	432	95.139
		scaf_33	2.8e-175	13620665	13620213	453	91.391
		scaf_33	3.68e-164	13787490	13787036	456	89.912
		scaf_33	6.7e-102	13560874	13560604	275	91
Tripsacum dactyloides (KS_B6_1)	NA	scaf_27	2.45e-103	57428549	57428279	275	92
		scaf_27	0	57445797	57444807	991	90.616
		scaf_27	0	57474019	57472761	1262	94.295
		scaf_27	0	57534951	57533693	1262	94.136
		scaf_27	0	57608409	57607151	1262	94.136
		scaf_27	0	57699873	57698616	1261	94.052
		scaf_27	0	57769868	57768610	1262	94.057
		scaf_27	0	57879624	57878365	1263	94.141
		scaf_27	0	57935180	57933921	1263	93.983
Tripsacum dactyloides (McKain334_5)	NA	scaf_35	1.59e-101	52381001	52380731	275	91.636
		scaf_35	0	52393478	52392785	695	91.511
		scaf_35	1.59e-101	52394035	52393736	301	89.369
		scaf_35	0	52442283	52441025	1262	94.216
		scaf_35	0	52497152	52495894	1262	94.136
		scaf_35	0	52565385	52564126	1263	93.903
Zea luxurians (RIL003)	Tcb1-S type	chr4	0	310410794	310409536	1262	94.216
		chr4	0	310434151	310433467	693	92.641
		chr4	0	310444372	310445382	1014	92.604
		chr4	1.54e-93	310454776	310455026	254	91.732
		chr4	2.55e-96	310473333	310473594	262	91.603
		chr4	0	310491366	310492024	659	93.778
		chr4	2.88e-11	310505515	310505576	62	88.71
		chr4	2.04e-72	310505579	310505776	201	92.04
		chr4	0	311397757	311396496	1262	95.325
	Ga1-S type	chr4	0	333752057	333753315	1261	95.638
		chr4	0	334197873	334196614	1263	94.299
		chr4	0	334221704	334221018	694	91.931
		chr4	0	334231926	334233183	1263	92.637
		chr4	0	334264068	334264726	659	94.537
		chr4	2.88e-11	334285029	334285090	62	88.71
		chr4	2.04e-72	334285093	334285291	202	92.079
		chr4	0	334876409	334877666	1261	98.573
		chr4	0	334953640	334954900	1261	99.366
		chr4	0	335031285	335032545	1261	99.048
		chr4	0	335087341	335088601	1261	99.048
		chr4	0	335165314	335166575	1262	98.019
		chr4	0	335264048	335265308	1261	99.128
		chr4	0	335326593	335327854	1262	99.97
		chr4	0	335446764	335448024	1261	99.048
		chr4	0	335530704	335531961	1261	98.81
		chr4	0	335582656	335583916	1261	99.048
		chr4	0	335680894	335682155	1262	98.098
		chr4	0	335768666	335769926	1261	99.048
		chr4	0	335813230	335814491	1262	98.97
		chr4	0	335963133	335964393	1261	99.128
		chr4	0	336047612	336048872	1261	98.81
		chr4	0	336092181	336093441	1261	99.048
		chr4	0	336198223	336199484	1262	98.019
		chr4	0	336295619	336296879	1261	99.524
		chr4	0	336352008	336353269	1262	98.97
		chr4	0	336489987	336491247	1261	99.366
		chr4	0	336552177	336553437	1261	99.286
		chr4	0	336611770	336613030	1261	98.81
		chr4	0	336716075	336717336	1262	98.098
		chr4	0	336862241	336863500	1261	99.286
		chr4	0	336906824	336908084	1261	99.128
		chr4	0	337073566	337074826	1261	98.969
		chr4	0	337100088	337101352	1265	98.419
Zea nicaraguensis (PI615697)	Ga1-S type	chr4	0	24200134	24198874	1261	99.207
		chr4	0	24251558	24250298	1261	98.89
		chr4	0	24421562	24420302	1261	99.207
		chr4	0	24491833	24490573	1261	99.207
		chr4	0	24604062	24602802	1262	98.019
		chr4	0	24683317	24682057	1261	98.652
		chr4	0	24739066	24737806	1261	99.207
		chr4	0	24794825	24793566	1261	99.366
		chr4	0	24873754	24872496	1262	98.415
		chr4	0	25666026	25664766	1261	99.286
		chr4	0	25734155	25732894	1262	99.128
		chr4	0	25847756	25846496	1261	99.048
		chr4	0	25908187	25906927	1261	99.445
		chr4	0	26008749	26007489	1262	98.257
		chr4	0	26097607	26096346	1262	98.811
		chr4	0	26132645	26131385	1261	99.366
		chr4	0	26206049	26204789	1261	99.445
		chr4	0	26297693	26296435	1262	98.653
		chr4	2.36e-77	26915313	26915116	201	93.532
		chr4	3.34e-11	26915374	26915316	59	89.831
		chr4	0	26936340	26935679	662	94.411
		chr4	6.37e-98	26960501	26960240	262	91.985
		chr4	0	26975526	26974269	1263	92.478
		chr4	0	26989001	26989687	694	92.363
		chr4	0	27013250	27014508	1263	94.062
		chr4	0	27401863	27400605	1261	95.638
	Tcb1-S type	chr4	0	49864116	49865377	1262	95.642
		chr4	2.37e-72	50769000	50768803	201	92.04
		chr4	3.34e-11	50769061	50769003	59	89.831
		chr4	0	50783210	50782549	662	93.505
		chr4	6.37e-98	50801231	50800970	262	91.985
		chr4	1.78e-93	50818721	50818471	254	91.732
		chr4	0	50829124	50828114	1014	92.604
		chr4	0	50839327	50840012	693	92.641
		chr4	0	50859586	50860844	1262	94.295
		chr4	2.37e-72	51889450	51889253	201	92.04
		chr4	3.34e-11	51889511	51889453	59	89.831
		chr4	0	51903034	51902373	662	93.807
		chr4	0	51910657	51911918	1262	96.355
		chr4	0	51944536	51945797	1262	96.434
		chr4	0	51978357	51979618	1262	96.513
		chr4	0	52012185	52013446	1262	96.593
		chr4	0	52046010	52047271	1262	96.513
		chr4	0	52079731	52080954	1225	96.408
		chr4	0	52111589	52112849	1262	95.483
		chr4	0	52164296	52165557	1262	96.355
		chr4	0	52198247	52199508	1262	96.434
		chr4	0	52231982	52233243	1263	96.12
		chr4	0	52266286	52267545	1261	95.638
		chr4	0	52325495	52326756	1263	96.358
		chr4	0	52366733	52367992	1261	96.114
		chr4	0	52385575	52386833	1263	95.566
Zea diploperennis (Gigi)	Ga1-S type	chr4	0	10568599	10569859	1261	95.638
		chr4	0	10893579	10892320	1262	94.374
		chr4	0	10902314	10901632	694	91.499
		chr4	0	10912533	10913790	1263	92.478
		chr4	5.73e-98	10925830	10926091	262	91.985
		chr4	0	10934376	10935034	659	94.689
		chr4	3.01e-11	10955284	10955345	62	88.71
		chr4	2.12e-77	10955348	10955545	201	93.532
		chr4	0	11394063	11395321	1263	98.892
		chr4	0	11470048	11471308	1261	99.286
		chr4	0	11503633	11504893	1261	99.128
		chr4	0	11578012	11579272	1261	99.128
		chr4	0	11691584	11692844	1261	99.445
		chr4	0	11726398	11727658	1261	99.286
		chr4	0	11797786	11799046	1261	99.445
		chr4	0	11832383	11833620	1238	98.627
		chr4	0	11914290	11915550	1261	99.762
		chr4	0	11953455	11954715	1261	99.286
		chr4	0	12012753	12014013	1261	99.207
		chr4	0	12087282	12088542	1261	98.493
		chr4	0	12157201	12158461	1261	98.969
		chr4	0	12171640	12172900	1261	98.81
	Tcb1-M type	chr4	0	33392223	33393484	1262	96.593
		chr4	0	34114118	34115379	1262	96.593
		chr4	0	34884677	34885938	1262	96.434
		chr4	0	35587508	35588769	1262	96.513
Zea diploperennis (Momo)	Ga1-S type	chr4	0	11219011	11220271	1261	95.718
		chr4	0	11537613	11536354	1262	94.532
		chr4	0	11546567	11545885	694	91.354
		chr4	0	11556786	11558043	1263	92.874
		chr4	4.37e-98	11570217	11570478	262	91.985
		chr4	0	11578797	11579455	659	94.841
		chr4	2.29e-11	11599708	11599769	62	88.71
		chr4	1.62e-77	11599772	11599969	201	93.532
		chr4	0	12038506	12039764	1263	98.892
		chr4	0	12114510	12115770	1261	99.286
		chr4	0	12148077	12149337	1261	99.048
		chr4	0	12222468	12223728	1261	99.048
		chr4	0	12335968	12337228	1261	99.445
		chr4	0	12370830	12372090	1261	99.286
		chr4	0	12442260	12443520	1261	99.445
		chr4	0	12476857	12478094	1238	98.384
		chr4	0	12558785	12560045	1261	99.683
		chr4	0	12597949	12599209	1261	99.286
		chr4	0	12657226	12658486	1261	99.207
		chr4	0	12731800	12733060	1261	98.493
		chr4	0	12812971	12814231	1261	98.969
		chr4	0	12827410	12828670	1261	98.81
	Tcb1-M type	chr4	0	35598807	35600068	1262	96.434
		chr4	0	36321149	36322410	1262	96.593
	ga1 type	chr4	0	41719349	41720098	760	92.632
		chr4	0	41739542	41740298	760	93.289
		chr4	1.67e-52	41763032	41763158	127	96.85
		chr4	0	41833171	41833927	760	94.211
		chr4	0	41845716	41846472	760	93.684
		chr4	0	41869766	41870317	552	94.928
Zea mays subsp. huehuetenangensis (RIMHU001)	Ga1-S type	chr4	0	7809128	7807869	1263	94.141
		chr4	0	7846319	7845632	693	91.775
		chr4	0	7880266	7881523	1263	92.874
		chr4	3.28e-89	7911673	7911938	266	89.85
		chr4	0	7920123	7920781	659	94.082
		chr4	1.02e-09	7953910	7953971	62	87.097
		chr4	1.55e-77	7953974	7954172	202	93.564
		chr4	0	8108769	8110029	1261	99.445
		chr4	0	8142905	8144165	1261	99.207
		chr4	0	8225895	8227155	1261	99.524
		chr4	0	8261096	8262356	1261	99.207
		chr4	0	8332328	8333588	1261	99.286
		chr4	0	8381362	8382622	1261	99.128
		chr4	0	8444198	8445458	1261	99.366
		chr4	0	8491091	8492351	1261	98.81
		chr4	0	8591197	8592457	1261	99.445
		chr4	0	8633795	8635055	1261	99.128
		chr4	0	8705014	8706274	1261	99.286
		chr4	0	8754026	8755286	1261	98.969
		chr4	0	8823762	8825022	1261	99.445
		chr4	0	8870609	8871869	1261	98.89
		chr4	0	8970717	8971977	1261	99.445
		chr4	0	9013334	9014594	1261	99.048
		chr4	0	9084758	9086018	1261	99.286
		chr4	0	9133771	9135031	1261	99.048
		chr4	0	9196645	9197905	1261	99.445
		chr4	0	9243507	9244767	1261	98.89
		chr4	0	9343611	9344871	1261	99.445
		chr4	0	9386227	9387487	1261	99.048
	Tcb1-S type	chr4	3.35e-74	29785836	29785639	201	92.537
		chr4	2.2e-11	29785897	29785839	59	89.831
		chr4	0	29799904	29799243	662	93.958
		chr4	9e-100	29815272	29815011	262	92.366
		chr4	5.46e-92	29835891	29835641	254	91.339
		chr4	0	29846275	29845265	1014	92.604
		chr4	0	29856493	29857177	693	92.496
		chr4	0	29901056	29902317	1262	96.434
		chr4	0	29946501	29947761	1262	96.117
		chr4	0	29998356	29999614	1262	96.117
		chr4	0	30042953	30044212	1261	96.352
		chr4	0	30061796	30063054	1263	95.487
Zea mays subsp. mexicana (TIL18)	Ga1-S type	chr4	0	21899079	21900326	1261	94.925
		chr4	0	22333148	22331892	1263	94.22
		chr4	1.88e-146	22350309	22349960	350	93.714
		chr4	0	22360513	22361770	1263	92.874
		chr4	4.35e-98	22373656	22373917	262	91.985
		chr4	0	22393980	22394638	659	94.385
		chr4	2.28e-11	22414857	22414918	62	88.71
		chr4	2.08e-76	22414921	22415120	202	93.069
		chr4	0	22920462	22921719	1261	98.652
		chr4	0	22993434	22994694	1261	99.286
		chr4	0	23027961	23029221	1261	99.128
		chr4	0	23156184	23157431	1261	95.004
		chr4	0	23588417	23587161	1263	94.299
		chr4	1.88e-146	23605599	23605250	350	93.714
		chr4	0	23615803	23617060	1263	92.953
		chr4	4.35e-98	23628944	23629205	262	91.985
		chr4	0	23649239	23649897	659	94.385
		chr4	2.28e-11	23670121	23670182	62	88.71
		chr4	2.08e-76	23670185	23670384	202	93.069
		chr4	0	24151718	24152975	1261	98.652
		chr4	0	24224731	24225991	1261	99.286
		chr4	0	24259250	24260510	1261	99.128
		chr4	0	24387402	24388661	1261	95.956
		chr4	0	24852271	24851660	614	95.114
		chr4	0	24853346	24852697	651	93.395
		chr4	0	24876216	24875529	694	92.075
		chr4	0	24927225	24928482	1263	92.637
		chr4	0	24963309	24963967	659	94.385
		chr4	2.28e-11	24984244	24984305	62	88.71
		chr4	7.48e-76	24984308	24984505	201	93.035
		chr4	0	25086111	25087368	1261	98.81
		chr4	0	25165246	25166506	1261	99.128
		chr4	0	25218215	25219475	1261	99.366
		chr4	0	25315140	25316401	1262	98.891
		chr4	0	25398581	25399841	1261	99.683
		chr4	0	25503105	25504365	1261	99.286
		chr4	0	25540790	25542050	1261	99.128
		chr4	0	25652184	25653443	1262	98.257
		chr4	0	25739501	25740761	1261	99.762
		chr4	0	25788388	25788821	434	99.078
		chr4	0	25791399	25792233	835	99.281
		chr4	0	25851748	25853008	1261	99.128
		chr4	0	25905790	25907050	1261	98.414
		chr4	0	25990950	25992210	1261	98.969
		chr4	0	26030843	26032103	1261	99.048
	Tcb1-M type	chr4	0	46415040	46416301	1262	96.434
		chr4	0	46439636	46440897	1262	96.197
		chr4	0	46504796	46506057	1262	96.276
Zea mays subsp. mexicana (TIL25)	Ga1-M type	chr4	0	14898184	14899444	1261	99.207
		chr4	9.74e-134	14936672	14936935	264	99.621
		chr4	0	14946097	14947098	1002	99.102
		chr4	0	14972636	14973896	1261	99.128
		chr4	0	15033845	15035105	1261	99.128
		chr4	0	15106856	15108116	1261	99.286
		chr4	0	15143291	15144551	1261	98.969
		chr4	0	15180292	15181552	1261	99.048
		chr4	0	15251679	15252939	1261	99.207
		chr4	0	15334905	15336165	1261	99.207
		chr4	0	15371390	15372650	1261	99.048
		chr4	0	15398202	15399462	1261	98.969
		chr4	3.6e-113	15460834	15461060	227	99.559
		chr4	0	15545415	15545893	479	98.956
		chr4	1.5e-07	15545891	15545927	37	97.297
		chr4	0	15545930	15546596	667	98.801
	Tcb1-S type	chr4	0	35798278	35799539	1262	96.434
		chr4	0	35822643	35823905	1263	96.437
		chr4	0	35859013	35860274	1262	96.276
		chr4	0	35949866	35951127	1262	96.434
		chr4	0	35974229	35975491	1263	96.358
		chr4	0	35998821	36000082	1262	96.355
		chr4	0	36136004	36137265	1262	96.434
		chr4	0	36167229	36168491	1263	96.437
		chr4	0	36191808	36193069	1262	96.355
		chr4	0	36839204	36838106	1099	98.089
		chr4	1.76e-76	36843718	36843552	167	98.204
		chr4	0	37022493	37023753	1262	96.83
		chr4	1.36e-77	38105438	38105241	201	93.532
		chr4	1.93e-11	38105499	38105441	59	89.831
		chr4	0	38145452	38144547	917	91.93
		chr4	0	38162399	38161142	1263	92.162
		chr4	0	38181569	38182258	694	91.787
		chr4	0	38189561	38190820	1263	94.378
Zea mays subsp. parviglumis (TIL01)	Ga1-S type	chr4	0	32537122	32538381	1261	95.638
		chr4	0	33061577	33060318	1263	94.299
		chr4	7.11e-146	33078725	33078374	352	93.466
		chr4	0	33088943	33090200	1263	92.953
		chr4	9.87e-95	33102303	33102564	262	91.221
		chr4	0	33125695	33126353	659	94.234
		chr4	2.39e-11	33155785	33155846	62	88.71
		chr4	3.63e-79	33155849	33156046	201	94.03
		chr4	0	33257372	33258629	1261	98.652
		chr4	0	33346807	33348067	1261	99.524
		chr4	0	33399713	33400973	1261	99.207
		chr4	0	33484136	33485397	1262	98.732
		chr4	0	33562009	33563269	1261	99.841
		chr4	0	33669976	33671236	1261	99.286
		chr4	0	33714578	33715838	1261	99.207
		chr4	0	33798076	33799336	1262	98.653
		chr4	0	33884105	33885365	1261	99.762
		chr4	0	33926150	33926583	434	98.618
		chr4	0	33933453	33934276	835	97.605
		chr4	0	33993305	33994564	1261	99.048
		chr4	0	34062344	34063604	1261	98.493
		chr4	0	34142405	34143665	1261	98.81
		chr4	0	34173335	34174595	1261	99.207
	Tcb1-S type	chr4	0	57929425	57930686	1262	96.513
		chr4	0	57953961	57955222	1262	96.434
		chr4	0	57985400	57986661	1262	96.513
		chr4	0	58009936	58011197	1262	96.434
		chr4	0	58041367	58042628	1262	96.513
		chr4	0	58065952	58067212	1261	96.59
		chr4	0	58090572	58091833	1262	96.434
		chr4	0	58739071	58737973	1099	97.998
		chr4	2.18e-76	58743586	58743420	167	98.204
		chr4	0	58922378	58923638	1262	96.751
		chr4	7.85e-76	60004698	60004500	202	93.069
		chr4	2.39e-11	60004759	60004701	59	89.831
		chr4	0	60044710	60043805	917	91.93
		chr4	0	60058327	60057070	1263	92.082
		chr4	0	60077497	60078186	694	91.931
		chr4	0	60085477	60086736	1263	94.537
Zea mays subsp. parviglumis (TIL11)	ga1 type	chr4	0	9066346	9067102	760	92.5
		chr4	0	9105440	9106192	759	92.622
		chr4	0	9135803	9136486	688	92.006
		chr4	1.52e-87	9169816	9170014	199	96.482
		chr4	0	9172691	9173184	497	91.751
		chr4	7.76e-21	9211674	9211749	76	92.105
		chr4	0	9243708	9244464	760	93.026
		chr4	0	9253580	9254336	760	92.5
		chr4	0	9318583	9319338	760	92.763
		chr4	0	9336584	9337101	518	93.629
		chr4	5.43e-92	9337189	9337420	236	93.22
		chr4	0	9371315	9372071	761	93.167
		chr4	1.1e-138	9418094	9418432	339	93.215
		chr4	2.94e-164	9425314	9425736	426	91.549
		chr4	0	9474453	9475025	582	92.955
		chr4	1.22e-63	9484578	9484752	175	92.571
		chr4	0	9493753	9494506	759	92.227
		chr4	0	9598747	9599502	760	92.368
		chr4	0	9632903	9633656	759	93.149
		chr4	1.46e-117	9737921	9738197	277	94.585
		chr4	0	9740783	9741247	468	92.735
		chr4	0	9809902	9810400	499	94.589
		chr4	3.27e-89	9819472	9819735	267	89.513
		chr4	0	9864399	9865155	760	93.947
		chr4	0	9896212	9896967	760	93.816
		chr4	0	9916333	9917081	758	92.216
Tcb1-M/Ga1-M type represent loci that lack corresponding female function sequence
